# Supplementary material for: Genomic Characterization of Listeria monocytogenes and Other Listeria Species Isolated from Sea Turtles
Source: MDPI journal article supplement (doi:10.3390/microorganisms12040817), 2024-04-18
Supplement: s1 [file s1]

Table S2. Gene presence between sea turtle strains.

| 2022.TE.32578.1.2         | 2022.TE.37041.1.2     | 2022.TE.37093.1.2                                                 | 2022.TE.37094.1.2                                                 | 2022.TE.37095.1.2       | 2023.TE.1767.1.2          | 2022.TE.25575.1.2         | 2023.TE.2348.1.2        |
|---------------------------|-----------------------|-------------------------------------------------------------------|-------------------------------------------------------------------|-------------------------|---------------------------|---------------------------|-------------------------|
| <i>L. monocytogenes</i>   | <i>L. innocua</i>     | <i>L. innocua</i>                                                 | <i>L. innocua</i>                                                 | <i>L. monocytogenes</i> | <i>L. ivanovii</i>        | <i>L. monocytogenes</i>   | <i>L. monocytogenes</i> |
| ST388                     | ST542                 | ST536                                                             | ST1481                                                            | ST204                   | NA                        | ST7                       | ST219                   |
| <i>fosX</i>               | <i>fosX</i>           | <i>fosX</i>                                                       | <i>fosX</i>                                                       | <i>fosX</i>             | <i>fosX</i>               | <i>fosX</i>               | <i>fosX</i>             |
| <i>lmo0919</i>            | <i>lmo0919</i>        | <i>lmo0919</i>                                                    | <i>lmo0919</i>                                                    | <i>lmo0919</i>          | <i>lmo0919</i>            | <i>lmo0919</i>            | <i>lmo0919</i>          |
| <i>norB</i>               | <i>norB</i>           | <i>norB</i>                                                       | <i>norB</i>                                                       | <i>norB</i>             | <i>norB</i>               | <i>norB</i>               | <i>norB</i>             |
| <i>sul</i>                | <i>sul</i>            | <i>sul</i>                                                        | <i>sul</i>                                                        | <i>sul</i>              | <i>sul</i>                | <i>sul</i>                | <i>sul</i>              |
| <i>lmo169</i>             | <i>lmo169</i>         | <i>lmo169</i>                                                     | <i>lmo169</i>                                                     | <i>lmo169</i>           | <i>lmo169</i>             | <i>lmo169</i>             | <i>lmo169</i>           |
| <i>LGI-2_LMSO2310</i>     | <i>LGI-2_LMSO2310</i> | <i>LGI-2_LMSO2310</i>                                             | <i>LGI-2_LMSO2310</i>                                             | <i>LGI-2_LMSO2310</i>   | <i>LGI-2_LMSO2310</i>     | <i>LGI-2_LMSO2310</i>     | <i>LGI-2_LMSO2310</i>   |
| /                         | /                     | /                                                                 | /                                                                 | LGI-2                   | <i>LGI-2_LMOA2320</i>     | /                         | /                       |
| /                         | /                     | /                                                                 | /                                                                 | /                       | <i>LGI-3_LmUB3PA_1705</i> | /                         | /                       |
| /                         | /                     | /                                                                 | /                                                                 | /                       | <i>LGI-3_LmUB3PA_1706</i> | /                         | /                       |
| <i>LGI-3_LmUB3PA_1685</i> | /                     | /                                                                 | /                                                                 | /                       | /                         | <i>LGI-3_LmUB3PA_1685</i> | /                       |
| /                         | /                     | /                                                                 | /                                                                 | <i>qacA</i>             | /                         | /                         | /                       |
| <i>lmo1799</i>            | <i>lmo1799</i>        | <i>lmo1799</i>                                                    | <i>lmo1799</i>                                                    | <i>lmo1799</i>          | <i>lmo1799</i>            | <i>lmo1799</i>            | <i>lmo1799</i>          |
| <i>lmo1800</i>            | <i>lmo1800</i>        | <i>lmo1800</i>                                                    | <i>lmo1800</i>                                                    | <i>lmo1800</i>          | <i>lmo1800</i>            | <i>lmo1800</i>            | <i>lmo1800</i>          |
|                           | x2                    | <i>SSI2_lmo0464</i><br><i>SSI2_lmo0465</i><br><i>SSI1_lmo0447</i> | <i>SSI2_lmo0464</i><br><i>SSI2_lmo0465</i><br><i>SSI1_lmo0447</i> |                         |                           |                           |                         |

|   |   |   |   |                                                                    |   |                                                                    |   |
|---|---|---|---|--------------------------------------------------------------------|---|--------------------------------------------------------------------|---|
| / | / | / | / | SSI1_Imo0444,<br>SSI1_Imo0445,<br>SSI1_Imo0446 and<br>SSI1_Imo0448 | / | SSI1_Imo0444,<br>SSI1_Imo0445,<br>SSI1_Imo0446 and<br>SSI1_Imo0448 | / |
|---|---|---|---|--------------------------------------------------------------------|---|--------------------------------------------------------------------|---|
