# Supplementary material for: Genomic Characterization of Listeria monocytogenes and Other Listeria Species Isolated from Sea Turtles
Source: MDPI journal article supplement (doi:10.3390/microorganisms12040817), 2024-04-18
Supplement: s1 [file s1]

Table S1. Sequences used in the study. (FPP-Food Processing Environment; RS-Retail Store; PH- Patient's House; NA-Not Applicable).

| ID                 | Matrix          | Year | ID Source. | Bioproject  | Biosample    | Reference               | ST |
|--------------------|-----------------|------|------------|-------------|--------------|-------------------------|----|
| 2016.TE.12559.1.2  | Environment     | 2016 | NA         | /           | /            | /                       | 7  |
| 2017.TE.4902.1.70  | Clinical        | /    | NA         | /           | /            | /                       | 7  |
| 2020.TE.122547.1.5 | Clinical        | 2020 | NA         | /           | /            | /                       | 7  |
| 2017.TE.4902.1.41  | Clinical        | /    | NA         | /           | /            | /                       | 7  |
| 2017.TE.4902.1.56  | Clinical        | /    | NA         | /           | /            | /                       | 7  |
| 2016.TE.12907.1.27 | Salami          | 2016 | FPP1       | PRJNA750067 | SAMN20429606 | Chiaverini et al., 2021 | 7  |
| 2016.TE.12907.1.26 | Salami          | 2016 | FPP1       | PRJNA750067 | SAMN20429607 | Chiaverini et al., 2021 | 7  |
| 2018.TE.6199.1.25  | Environment     | 2018 | RS5        | PRJNA750067 | SAMN20429608 | Chiaverini et al., 2021 | 7  |
| 2018.TE.6199.1.23  | Environment     | 2018 | RS5        | PRJNA750067 | SAMN20429609 | Chiaverini et al., 2021 | 7  |
| 2018.TE.6199.1.24  | Environment     | 2018 | RS5        | PRJNA750067 | SAMN20429610 | Chiaverini et al., 2021 | 7  |
| 2018.TE.6199.1.26  | Environment     | 2018 | RS5        | PRJNA750067 | SAMN20429611 | Chiaverini et al., 2021 | 7  |
| 2018.TE.6199.1.29  | Environment     | 2018 | RS5        | PRJNA750067 | SAMN20429612 | Chiaverini et al., 2021 | 7  |
| 2018.TE.6199.1.32  | Environment     | 2018 | RS5        | PRJNA750067 | SAMN20429613 | Chiaverini et al., 2021 | 7  |
| 2016.TE.6891.1.69  | Salami          | 2016 | FPP2       | PRJNA750067 | SAMN20429614 | Chiaverini et al., 2021 | 7  |
| 2016.TE.6891.1.71  | Salami          | 2016 | FPP2       | PRJNA750067 | SAMN20429615 | Chiaverini et al., 2021 | 7  |
| 2016.TE.7723.1.40  | Hog head cheese | 2016 | FPP1       | PRJNA750067 | SAMN20429616 | Chiaverini et al., 2021 | 7  |
| 2016.TE.3350.1.35  | Environment     | 2016 | FPP1       | PRJNA750067 | SAMN20429617 | Chiaverini et al., 2021 | 7  |
| 2016.TE.1976.1.83  | Clinical        | 2015 | NA         | PRJNA750067 | SAMN20429618 | Duranti et al., 2018    | 7  |
| 2015.TE.28740.1.45 | Clinical        | 2015 | NA         | PRJNA750067 | SAMN20429619 | Duranti et al., 2018    | 7  |
| 2016.TE.8594.1.4   | Environment     | 2016 | FPP3       | PRJNA750067 | SAMN20429620 | Chiaverini et al., 2021 | 7  |
| 2018.TE.5686.1.4   | Environment     | 2018 | PH2        | PRJNA750067 | SAMN20429621 | Chiaverini et al., 2021 | 7  |
| 2018.TE.6199.1.12  | Environment     | 2018 | PH2        | PRJNA750067 | SAMN20429622 | Chiaverini et al., 2021 | 7  |
| 2018.TE.6199.1.13  | Environment     | 2018 | PH2        | PRJNA750067 | SAMN20429623 | Chiaverini et al., 2021 | 7  |
| 2018.TE.6199.1.30  | Environment     | 2018 | RS5        | PRJNA750067 | SAMN20429624 | Chiaverini et al., 2021 | 7  |
| 2016.TE.2578.1.69  | Clinical        | 2016 | NA         | PRJNA750067 | SAMN20429625 | Chiaverini et al., 2021 | 7  |
| 2016.TE.3350.1.48  | Environment     | 2016 | FPP1       | PRJNA750067 | SAMN20429626 | Chiaverini et al., 2021 | 7  |
| 2016.TE.3350.1.49  | Environment     | 2016 | FPP1       | PRJNA750067 | SAMN20429627 | Chiaverini et al., 2021 | 7  |
| 2016.TE.3350.1.36  | Environment     | 2016 | FPP1       | PRJNA750067 | SAMN20429628 | Chiaverini et al., 2021 | 7  |
| 2016.TE.3350.1.37  | Environment     | 2016 | FPP1       | PRJNA750067 | SAMN20429629 | Chiaverini et al., 2021 | 7  |

|                    |                 |      |      |             |              |                                                             |   |
|--------------------|-----------------|------|------|-------------|--------------|-------------------------------------------------------------|---|
| 2016.TE.5761.1.61  | Clinical        | 2016 | NA   | PRJNA750067 | SAMN20429630 | Duranti et al., 2018                                        | 7 |
| 2016.TE.10956.1.20 | Environment     | 2016 | FPP3 | PRJNA750067 | SAMN21220761 | Chiaverini et al., 2021                                     | 7 |
| 2016.TE.3350.1.45  | Environment     | 2016 | FPP1 | PRJNA750067 | SAMN20429631 | Chiaverini et al., 2021                                     | 7 |
| 2016.TE.7723.1.45  | Hog head cheese | 2016 | FPP1 | PRJNA750067 | SAMN20429632 | Chiaverini et al., 2021                                     | 7 |
| 2016.TE.3350.1.39  | Environment     | 2016 | FPP1 | PRJNA750067 | SAMN20429633 | Chiaverini et al., 2021                                     | 7 |
| 2016.TE.10956.1.26 | Environment     | 2016 | RS2  | PRJNA750067 | SAMN21220762 | Chiaverini et al., 2021                                     | 7 |
| 2015.TE.19114.1.9  | Clinical        | 2015 | NA   | PRJNA750067 | SAMN20429634 | Chiaverini et al., 2021                                     | 7 |
| 2016.TE.7723.1.55  | Hog head cheese | 2016 | FPP1 | PRJNA750067 | SAMN20429635 | Chiaverini et al., 2021                                     | 7 |
| 2016.TE.7723.1.49  | Hog head cheese | 2016 | FPP1 | PRJNA750067 | SAMN20429636 | Chiaverini et al., 2021                                     | 7 |
| 2016.TE.1976.1.84  | Clinical        | 2015 | NA   | PRJNA750067 | SAMN20429637 | Duranti et al., 2018                                        | 7 |
| 2016.TE.1976.1.85  | Clinical        | 2015 | NA   | PRJNA750067 | SAMN20429638 | Chiaverini et al., 2021                                     | 7 |
| 2015.TE.18427.1.10 | Clinical        | 2015 | NA   | PRJNA750067 | SAMN20429639 | Chiaverini et al., 2021                                     | 7 |
| 2015.TE.18427.1.4  | Clinical        | 2015 | NA   | PRJNA750067 | SAMN20429640 | Chiaverini et al., 2021                                     | 7 |
| 2015.TE.18427.1.6  | Clinical        | 2015 | NA   | PRJNA750067 | SAMN20429641 | Duranti et al., 2018                                        | 7 |
| 2015.TE.18427.1.8  | Clinical        | 2015 | NA   | PRJNA750067 | SAMN20429642 | Duranti et al., 2018                                        | 7 |
| 2015.TE.19114.1.7  | Clinical        | 2015 | NA   | PRJNA750067 | SAMN20429643 | Duranti et al., 2018                                        | 7 |
| 2015.TE.28740.1.46 | Clinical        | 2015 | NA   | PRJNA750067 | SAMN20429644 | Chiaverini et al., 2021                                     | 7 |
| 2015.TE.29172.1.7  | Clinical        | 2015 | NA   | PRJNA750067 | SAMN20429645 | Duranti et al., 2018;<br>Orsini et al., 2018a<br>(CP014790) | 7 |
| 2015.TE.31940.1.12 | Clinical        | 2015 | NA   | PRJNA750067 | SAMN20429646 | Duranti et al., 2018                                        | 7 |
| 2016.TE.10956.1.21 | Environment     | 2016 | RS2  | PRJNA750067 | SAMN20429647 | Chiaverini et al., 2021                                     | 7 |
| 2016.TE.10956.1.22 | Environment     | 2016 | RS2  | PRJNA750067 | SAMN20429648 | Chiaverini et al., 2021                                     | 7 |
| 2016.TE.10956.1.23 | Environment     | 2016 | RS2  | PRJNA750067 | SAMN20429649 | Chiaverini et al., 2021                                     | 7 |
| 2016.TE.10956.1.24 | Environment     | 2016 | RS2  | PRJNA750067 | SAMN20429650 | Chiaverini et al., 2021                                     | 7 |
| 2016.TE.10956.1.27 | Environment     | 2016 | RS2  | PRJNA750067 | SAMN20429651 | Chiaverini et al., 2021                                     | 7 |
| 2016.TE.10956.1.28 | Environment     | 2016 | RS2  | PRJNA750067 | SAMN20429652 | Chiaverini et al., 2021                                     | 7 |
| 2016.TE.10956.1.29 | Environment     | 2016 | RS2  | PRJNA750067 | SAMN20429653 | Chiaverini et al., 2021                                     | 7 |
| 2016.TE.10956.1.30 | Environment     | 2016 | RS2  | PRJNA750067 | SAMN20429654 | Chiaverini et al., 2021                                     | 7 |
| 2016.TE.10956.1.5  | Bresaola        | 2016 | PH1  | PRJNA750067 | SAMN20429655 | Chiaverini et al., 2021                                     | 7 |
| 2016.TE.10956.1.6  | Bresaola        | 2016 | PH1  | PRJNA750067 | SAMN20429656 | Chiaverini et al., 2021                                     | 7 |
| 2016.TE.10956.1.7  | Bresaola        | 2016 | PH1  | PRJNA750067 | SAMN20429657 | Chiaverini et al., 2021                                     | 7 |

|                    |                 |      |      |             |              |                         |   |
|--------------------|-----------------|------|------|-------------|--------------|-------------------------|---|
| 2016.TE.12907.1.13 | Pancetta        | 2016 | FPP1 | PRJNA750067 | SAMN20429658 | Chiaverini et al., 2021 | 7 |
| 2016.TE.12907.1.14 | Pancetta        | 2016 | FPP1 | PRJNA750067 | SAMN20429659 | Chiaverini et al., 2021 | 7 |
| 2016.TE.12907.1.16 | Pancetta        | 2016 | FPP1 | PRJNA750067 | SAMN20429660 | Chiaverini et al., 2021 | 7 |
| 2016.TE.12907.1.19 | Pancetta        | 2016 | FPP1 | PRJNA750067 | SAMN20429661 | Chiaverini et al., 2021 | 7 |
| 2016.TE.12907.1.23 | Salami          | 2016 | FPP1 | PRJNA750067 | SAMN20429662 | Chiaverini et al., 2021 | 7 |
| 2016.TE.12907.1.24 | Salami          | 2016 | FPP1 | PRJNA750067 | SAMN20429663 | Chiaverini et al., 2021 | 7 |
| 2016.TE.12907.1.25 | Salami          | 2016 | FPP1 | PRJNA750067 | SAMN20429664 | Chiaverini et al., 2021 | 7 |
| 2016.TE.12907.1.28 | Salami          | 2016 | FPP1 | PRJNA750067 | SAMN20429665 | Chiaverini et al., 2021 | 7 |
| 2016.TE.12907.1.29 | Salami          | 2016 | FPP1 | PRJNA750067 | SAMN20429666 | Chiaverini et al., 2021 | 7 |
| 2016.TE.12907.1.30 | Salami          | 2016 | FPP1 | PRJNA750067 | SAMN20429667 | Chiaverini et al., 2021 | 7 |
| 2016.TE.12907.1.31 | Salami          | 2016 | FPP1 | PRJNA750067 | SAMN20429668 | Chiaverini et al., 2021 | 7 |
| 2016.TE.15639.1.22 | Environment     | 2016 | RS2  | PRJNA750067 | SAMN20429669 | Chiaverini et al., 2021 | 7 |
| 2016.TE.15639.1.26 | Environment     | 2016 | RS2  | PRJNA750067 | SAMN21220763 | Chiaverini et al., 2021 | 7 |
| 2016.TE.15827.1.11 | Pancetta        | 2016 | FPP1 | PRJNA750067 | SAMN20429670 | Chiaverini et al., 2021 | 7 |
| 2016.TE.15827.1.15 | Loin            | 2016 | FPP1 | PRJNA750067 | SAMN20429671 | Chiaverini et al., 2021 | 7 |
| 2016.TE.15827.1.6  | Loin            | 2016 | FPP1 | PRJNA750067 | SAMN20429672 | Chiaverini et al., 2021 | 7 |
| 2016.TE.1976.1.81  | Clinical        | 2015 | NA   | PRJNA750067 | SAMN20429673 | Duranti et al., 2018    | 7 |
| 2016.TE.1976.1.82  | Clinical        | 2015 | NA   | PRJNA750067 | SAMN20429674 | Duranti et al., 2018    | 7 |
| 2016.TE.1976.1.90  | Clinical        | 2016 | NA   | PRJNA750067 | SAMN20429675 | Duranti et al., 2018    | 7 |
| 2016.TE.2578.1.71  | Clinical        | 2016 | NA   | PRJNA750067 | SAMN20429676 | Duranti et al., 2018    | 7 |
| 2016.TE.2578.1.76  | Hog head cheese | 2016 | RS1  | PRJNA750067 | SAMN20429677 | Chiaverini et al., 2021 | 7 |
| 2016.TE.3350.1.10  | Clinical        | 2016 | NA   | PRJNA750067 | SAMN20429678 | Duranti et al., 2018    | 7 |
| 2016.TE.3350.1.11  | Environment     | 2016 | FPP1 | PRJNA750067 | SAMN20429679 | Chiaverini et al., 2021 | 7 |
| 2016.TE.3350.1.12  | Environment     | 2016 | FPP1 | PRJNA750067 | SAMN20429680 | Chiaverini et al., 2021 | 7 |
| 2016.TE.3350.1.18  | Environment     | 2016 | FPP1 | PRJNA750067 | SAMN20429681 | Chiaverini et al., 2021 | 7 |
| 2016.TE.3350.1.19  | Environment     | 2016 | FPP1 | PRJNA750067 | SAMN20429682 | Chiaverini et al., 2021 | 7 |
| 2016.TE.3350.1.24  | Environment     | 2016 | FPP1 | PRJNA750067 | SAMN20429683 | Chiaverini et al., 2021 | 7 |
| 2016.TE.3350.1.27  | Environment     | 2016 | FPP1 | PRJNA750067 | SAMN20429684 | Chiaverini et al., 2021 | 7 |
| 2016.TE.3350.1.28  | Environment     | 2016 | FPP1 | PRJNA750067 | SAMN20429685 | Chiaverini et al., 2021 | 7 |
| 2016.TE.3350.1.40  | Environment     | 2016 | FPP1 | PRJNA750067 | SAMN20429687 | Chiaverini et al., 2021 | 7 |
| 2016.TE.3350.1.42  | Environment     | 2016 | FPP1 | PRJNA750067 | SAMN20429688 | Chiaverini et al., 2021 | 7 |
| 2016.TE.3350.1.44  | Environment     | 2016 | FPP1 | PRJNA750067 | SAMN20429689 | Chiaverini et al., 2021 | 7 |

|                   |                 |      |      |             |              |                         |   |
|-------------------|-----------------|------|------|-------------|--------------|-------------------------|---|
| 2016.TE.3350.1.50 | Environment     | 2016 | FPP1 | PRJNA750067 | SAMN20429690 | Chiaverini et al., 2021 | 7 |
| 2016.TE.3350.1.51 | Environment     | 2016 | FPP1 | PRJNA750067 | SAMN20429691 | Chiaverini et al., 2021 | 7 |
| 2016.TE.3350.1.52 | Hog head cheese | 2016 | FPP1 | PRJNA750067 | SAMN20429692 | Chiaverini et al., 2021 | 7 |
| 2016.TE.3350.1.55 | Hog head cheese | 2016 | FPP1 | PRJNA750067 | SAMN20429693 | Chiaverini et al., 2021 | 7 |
| 2016.TE.3350.1.56 | Environment     | 2016 | FPP1 | PRJNA750067 | SAMN20429694 | Chiaverini et al., 2021 | 7 |
| 2016.TE.3350.1.57 | Environment     | 2016 | FPP1 | PRJNA750067 | SAMN20429695 | Chiaverini et al., 2021 | 7 |
| 2016.TE.3350.1.7  | Hog head cheese | 2016 | FPP1 | PRJNA750067 | SAMN20429696 | Chiaverini et al., 2021 | 7 |
| 2016.TE.3350.1.9  | Hog head cheese | 2016 | FPP1 | PRJNA750067 | SAMN20429698 | Chiaverini et al., 2021 | 7 |
| 2016.TE.5761.1.62 | Clinical        | 2016 | NA   | PRJNA750067 | SAMN20429699 | Duranti et al., 2018    | 7 |
| 2016.TE.5761.1.63 | Clinical        | 2016 | NA   | PRJNA750067 | SAMN20429700 | Duranti et al., 2018    | 7 |
| 2016.TE.5761.1.64 | Clinical        | 2016 | NA   | PRJNA750067 | SAMN20429701 | Duranti et al., 2018    | 7 |
| 2016.TE.5761.1.65 | Clinical        | 2016 | NA   | PRJNA750067 | SAMN20429702 | Duranti et al., 2018    | 7 |
| 2016.TE.5761.1.66 | Clinical        | 2016 | NA   | PRJNA750067 | SAMN20429703 | Duranti et al., 2018    | 7 |
| 2016.TE.5761.1.67 | Clinical        | 2016 | NA   | PRJNA750067 | SAMN20429704 | Duranti et al., 2018    | 7 |
| 2016.TE.5761.1.70 | Salami          | 2016 | FPP2 | PRJNA750067 | SAMN20429706 | Chiaverini et al., 2021 | 7 |
| 2016.TE.5761.1.71 | Salami          | 2016 | FPP2 | PRJNA750067 | SAMN20429707 | Chiaverini et al., 2021 | 7 |
| 2016.TE.5761.1.73 | Salami          | 2016 | FPP2 | PRJNA750067 | SAMN20429708 | Chiaverini et al., 2021 | 7 |
| 2016.TE.5761.1.74 | Salami          | 2016 | FPP2 | PRJNA750067 | SAMN20429709 | Chiaverini et al., 2021 | 7 |
| 2016.TE.5761.1.75 | Salami          | 2016 | FPP2 | PRJNA750067 | SAMN20429710 | Chiaverini et al., 2021 | 7 |
| 2016.TE.5761.1.76 | Salami          | 2016 | FPP2 | PRJNA750067 | SAMN20429711 | Chiaverini et al., 2021 | 7 |
| 2016.TE.6891.1.61 | Salami          | 2016 | FPP2 | PRJNA750067 | SAMN20429712 | Chiaverini et al., 2021 | 7 |
| 2016.TE.6891.1.62 | Salami          | 2016 | FPP2 | PRJNA750067 | SAMN20429713 | Chiaverini et al., 2021 | 7 |
| 2016.TE.6891.1.63 | Salami          | 2016 | FPP2 | PRJNA750067 | SAMN20429714 | Chiaverini et al., 2021 | 7 |
| 2016.TE.6891.1.64 | Salami          | 2016 | FPP2 | PRJNA750067 | SAMN20429715 | Chiaverini et al., 2021 | 7 |
| 2016.TE.6891.1.65 | Salami          | 2016 | FPP2 | PRJNA750067 | SAMN20429716 | Chiaverini et al., 2021 | 7 |
| 2016.TE.6891.1.66 | Salami          | 2016 | FPP2 | PRJNA750067 | SAMN20429717 | Chiaverini et al., 2021 | 7 |
| 2016.TE.6891.1.67 | Salami          | 2016 | FPP2 | PRJNA750067 | SAMN20429718 | Chiaverini et al., 2021 | 7 |
| 2016.TE.6891.1.68 | Salami          | 2016 | FPP2 | PRJNA750067 | SAMN20429719 | Chiaverini et al., 2021 | 7 |
| 2016.TE.6891.1.75 | Clinical        | 2016 | NA   | PRJNA750067 | SAMN20429721 | Chiaverini et al., 2021 | 7 |
| 2016.TE.6891.1.76 | Clinical        | 2016 | NA   | PRJNA750067 | SAMN20429722 | Duranti et al., 2018    | 7 |
| 2016.TE.6891.1.79 | Environment     | 2016 | RS3  | PRJNA750067 | SAMN21220764 | Chiaverini et al., 2021 | 7 |
| 2016.TE.6891.1.80 | Environment     | 2016 | RS3  | PRJNA750067 | SAMN20429723 | Chiaverini et al., 2021 | 7 |

|                   |                 |      |      |             |              |                         |   |
|-------------------|-----------------|------|------|-------------|--------------|-------------------------|---|
| 2016.TE.6891.1.81 | Environment     | 2016 | RS3  | PRJNA750067 | SAMN20429724 | Chiaverini et al., 2021 | 7 |
| 2016.TE.6891.1.82 | Environment     | 2016 | RS3  | PRJNA750067 | SAMN20429725 | Chiaverini et al., 2021 | 7 |
| 2016.TE.6891.1.83 | Environment     | 2016 | RS3  | PRJNA750067 | SAMN20429726 | Chiaverini et al., 2021 | 7 |
| 2016.TE.6891.1.84 | Salami          | 2016 | FPP1 | PRJNA750067 | SAMN20429727 | Chiaverini et al., 2021 | 7 |
| 2016.TE.6891.1.85 | Loin            | 2016 | FPP1 | PRJNA750067 | SAMN20429728 | Chiaverini et al., 2021 | 7 |
| 2016.TE.6891.1.86 | Salami          | 2016 | FPP1 | PRJNA750067 | SAMN20429729 | Chiaverini et al., 2021 | 7 |
| 2016.TE.6891.1.90 | Pork cheek      | 2016 | FPP1 | PRJNA750067 | SAMN20429730 | Chiaverini et al., 2021 | 7 |
| 2016.TE.6891.1.91 | Pork cheek      | 2016 | FPP1 | PRJNA750067 | SAMN20429731 | Chiaverini et al., 2021 | 7 |
| 2016.TE.6891.1.92 | Pork cheek      | 2016 | FPP1 | PRJNA750067 | SAMN20429732 | Chiaverini et al., 2021 | 7 |
| 2016.TE.6891.1.93 | Pork cheek      | 2016 | FPP1 | PRJNA750067 | SAMN20429733 | Chiaverini et al., 2021 | 7 |
| 2016.TE.6891.1.94 | Pork cheek      | 2016 | FPP1 | PRJNA750067 | SAMN20429734 | Chiaverini et al., 2021 | 7 |
| 2016.TE.7723.1.41 | Hog head cheese | 2016 | FPP1 | PRJNA750067 | SAMN20429735 | Chiaverini et al., 2021 | 7 |
| 2016.TE.7723.1.42 | Hog head cheese | 2016 | FPP1 | PRJNA750067 | SAMN20429736 | Chiaverini et al., 2021 | 7 |
| 2016.TE.7723.1.43 | Hog head cheese | 2016 | FPP1 | PRJNA750067 | SAMN20429737 | Chiaverini et al., 2021 | 7 |
| 2016.TE.7723.1.44 | Hog head cheese | 2016 | FPP1 | PRJNA750067 | SAMN20429738 | Chiaverini et al., 2021 | 7 |
| 2016.TE.7723.1.46 | Hog head cheese | 2016 | FPP1 | PRJNA750067 | SAMN20429739 | Chiaverini et al., 2021 | 7 |
| 2016.TE.7723.1.47 | Hog head cheese | 2016 | FPP1 | PRJNA750067 | SAMN20429740 | Chiaverini et al., 2021 | 7 |
| 2016.TE.7723.1.48 | Hog head cheese | 2016 | FPP1 | PRJNA750067 | SAMN20429741 | Chiaverini et al., 2021 | 7 |
| 2016.TE.7723.1.50 | Hog head cheese | 2016 | FPP1 | PRJNA750067 | SAMN20429742 | Chiaverini et al., 2021 | 7 |
| 2016.TE.7723.1.51 | Hog head cheese | 2016 | FPP1 | PRJNA750067 | SAMN20429743 | Chiaverini et al., 2021 | 7 |
| 2016.TE.7723.1.52 | Hog head cheese | 2016 | FPP1 | PRJNA750067 | SAMN20429744 | Chiaverini et al., 2021 | 7 |
| 2016.TE.7723.1.53 | Hog head cheese | 2016 | FPP1 | PRJNA750067 | SAMN20429745 | Chiaverini et al., 2021 | 7 |
| 2016.TE.7723.1.54 | Hog head cheese | 2016 | FPP1 | PRJNA750067 | SAMN20429746 | Chiaverini et al., 2021 | 7 |
| 2016.TE.8594.1.5  | Environment     | 2016 | FPP3 | PRJNA750067 | SAMN21220765 | Chiaverini et al., 2021 | 7 |
| 2016.TE.8594.1.6  | Environment     | 2016 | FPP3 | PRJNA750067 | SAMN20429747 | Chiaverini et al., 2021 | 7 |
| 2016.TE.8594.1.7  | Environment     | 2016 | FPP3 | PRJNA750067 | SAMN20429748 | Chiaverini et al., 2021 | 7 |
| 2016.TE.8594.1.8  | Environment     | 2016 | FPP3 | PRJNA750067 | SAMN20429749 | Chiaverini et al., 2021 | 7 |
| 2016.TE.9198.1.20 | Environment     | 2016 | FPP3 | PRJNA750067 | SAMN20429750 | Chiaverini et al., 2021 | 7 |
| 2016.TE.9198.1.21 | Environment     | 2016 | FPP3 | PRJNA750067 | SAMN20429751 | Chiaverini et al., 2021 | 7 |
| 2016.TE.9198.1.22 | Environment     | 2016 | FPP3 | PRJNA750067 | SAMN20429752 | Chiaverini et al., 2021 | 7 |
| 2016.TE.9198.1.23 | Environment     | 2016 | FPP3 | PRJNA750067 | SAMN20429753 | Chiaverini et al., 2021 | 7 |
| 2016.TE.9198.1.26 | Environment     | 2016 | FPP3 | PRJNA750067 | SAMN20429754 | Chiaverini et al., 2021 | 7 |

|                    |             |      |     |             |              |                                                             |   |
|--------------------|-------------|------|-----|-------------|--------------|-------------------------------------------------------------|---|
| 2018.TE.5376.1.4   | Clinical    | 2018 | NA  | PRJNA750067 | SAMN20429755 | Orsini et al., 2018b<br>(CP029372)                          | 7 |
| 2018.TE.5686.1.2   | Environment | 2016 | PH2 | PRJNA750067 | SAMN20429756 | Chiaverini et al., 2021                                     | 7 |
| 2018.TE.5686.1.3   | Environment | 2016 | PH2 | PRJNA750067 | SAMN20429757 | Chiaverini et al., 2021                                     | 7 |
| 2018.TE.5686.1.6   | Environment | 2016 | PH2 | PRJNA750067 | SAMN20429758 | Chiaverini et al., 2021                                     | 7 |
| 2018.TE.6199.1.10  | Environment | 2016 | PH2 | PRJNA750067 | SAMN20429759 | Chiaverini et al., 2021                                     | 7 |
| 2018.TE.6199.1.11  | Environment | 2016 | PH2 | PRJNA750067 | SAMN20429760 | Chiaverini et al., 2021                                     | 7 |
| 2018.TE.6199.1.14  | Environment | 2016 | PH2 | PRJNA750067 | SAMN20429761 | Chiaverini et al., 2021                                     | 7 |
| 2018.TE.6199.1.15  | Environment | 2016 | PH2 | PRJNA750067 | SAMN20429762 | Chiaverini et al., 2021                                     | 7 |
| 2018.TE.6199.1.16  | Environment | 2016 | PH2 | PRJNA750067 | SAMN20429763 | Chiaverini et al., 2021                                     | 7 |
| 2018.TE.6199.1.18  | Environment | 2018 | RS5 | PRJNA750067 | SAMN20429764 | Chiaverini et al., 2021                                     | 7 |
| 2018.TE.6199.1.19  | Environment | 2018 | RS5 | PRJNA750067 | SAMN20429765 | Chiaverini et al., 2021                                     | 7 |
| 2018.TE.6199.1.2   | Environment | 2018 | PH2 | PRJNA750067 | SAMN20429766 | Chiaverini et al., 2021                                     | 7 |
| 2018.TE.6199.1.20  | Environment | 2018 | RS5 | PRJNA750067 | SAMN20429767 | Chiaverini et al., 2021                                     | 7 |
| 2018.TE.6199.1.21  | Environment | 2018 | RS5 | PRJNA750067 | SAMN20429768 | Chiaverini et al., 2021                                     | 7 |
| 2018.TE.6199.1.22  | Environment | 2018 | RS5 | PRJNA750067 | SAMN20429769 | Chiaverini et al., 2021                                     | 7 |
| 2018.TE.6199.1.27  | Environment | 2018 | RS5 | PRJNA750067 | SAMN20429770 | Chiaverini et al., 2021                                     | 7 |
| 2018.TE.6199.1.28  | Environment | 2018 | RS5 | PRJNA750067 | SAMN20429771 | Chiaverini et al., 2021                                     | 7 |
| 2018.TE.6199.1.3   | Environment | 2018 | PH2 | PRJNA750067 | SAMN20429772 | Chiaverini et al., 2021                                     | 7 |
| 2018.TE.6199.1.31  | Environment | 2018 | RS5 | PRJNA750067 | SAMN20429773 | Chiaverini et al., 2021                                     | 7 |
| 2018.TE.6199.1.4   | Environment | 2018 | PH2 | PRJNA750067 | SAMN20429774 | Chiaverini et al., 2021                                     | 7 |
| 2018.TE.6199.1.5   | Environment | 2018 | PH2 | PRJNA750067 | SAMN20429775 | Chiaverini et al., 2021                                     | 7 |
| 2018.TE.6199.1.6   | Environment | 2018 | PH2 | PRJNA750067 | SAMN20429776 | Chiaverini et al., 2021                                     | 7 |
| 2018.TE.6199.1.7   | Environment | 2018 | PH2 | PRJNA750067 | SAMN20429777 | Chiaverini et al., 2021                                     | 7 |
| 2018.TE.6199.1.8   | Environment | 2018 | PH2 | PRJNA750067 | SAMN20429778 | Chiaverini et al., 2021                                     | 7 |
| 2018.TE.6199.1.9   | Environment | 2018 | PH2 | PRJNA750067 | SAMN20429779 | Chiaverini et al., 2021                                     | 7 |
| 2015.TE.29172.1.12 | Clinical    | 2015 | NA  | PRJNA750067 | SAMN20429780 | Duranti et al., 2018                                        | 7 |
| 2016.TE.10956.1.13 | Environment | 2016 | RS4 | /           | /            | /                                                           | 7 |
| 2017.TE.1028.1.3   | Clinical    | 2016 | NA  | PRJNA750067 | SAMN20429781 | Chiaverini et al., 2021                                     | 7 |
| 2015.TE.21231.1.27 | Clinical    | 2014 | NA  | PRJNA750067 | SAMN20429782 | Duranti et al., 2018;<br>Orsini et al., 2018a<br>(CP014261) | 7 |

|                        |                       |      |    |                             |                              |                   |            |
|------------------------|-----------------------|------|----|-----------------------------|------------------------------|-------------------|------------|
| 2019.TE.22285.1.5      | null                  | /    | /  | /                           | /                            | /                 | 7          |
| 2019.TE.22285.1.6      | null                  | /    | /  | /                           | /                            | /                 | 7          |
| 2022.TE.32578.1.2      | Sea Turtles           | 2022 | NA | /                           | /                            | This study        | 388        |
| 2022.TE.37041.1.2      | Sea Turtles           | 2022 | NA | /                           | /                            | This study        | L.innocua  |
| 2022.TE.37093.1.2      | Sea Turtles           | 2022 | NA | /                           | /                            | This study        | L.innocua  |
| 2022.TE.37094.1.2      | Sea Turtles           | 2022 | NA | /                           | /                            | This study        | L.innocua  |
| 2022.TE.37095.1.2      | Sea Turtles           | 2022 | NA | /                           | /                            | This study        | 204        |
| 2023.TE.1767.1.2       | Sea Turtles           | 2022 | NA | /                           | /                            | This study        | L.ivanovii |
| 2022.TE.25575.1.2      | Sea Turtles           | 2022 | NA | /                           | /                            | This study        | 7          |
| 2023.TE.2348.1.2       | Sea Turtles           | 2023 | NA | /                           | /                            | This study        | 219        |
| 2023.EXT.0907.1659.580 | meat environment      | 2012 | NA | PRJNA320339                 | <a href="#">SAMN04932633</a> | Fox et al., 2016  | 204        |
| 2023.EXT.0907.1655.390 | meat                  | 2015 | NA | PRJNA320339                 | <a href="#">SAMN04932632</a> | Fox et al., 2016  | 204        |
| 2023.EXT.0907.1653.510 | meat                  | 2015 | NA | PRJNA320339                 | <a href="#">SAMN04932631</a> | Fox et al., 2016  | 204        |
| 2023.EXT.0907.1650.480 | dairy environment     | 2006 | NA | PRJNA320339                 | <a href="#">SAMN04932629</a> | Fox et al., 2016  | 204        |
| 2023.EXT.0907.1651.530 | dairy environment     | 2015 | NA | PRJNA320339                 | <a href="#">SAMN04932630</a> | Fox et al., 2016  | 204        |
| 2023.EXT.0907.1649.340 | dairy milk            | 2012 | NA | PRJNA320339                 | <a href="#">SAMN04932628</a> | Fox et al., 2016  | 204        |
| 2023.EXT.0907.1648.270 | dairy cheese          | 2012 | NA | PRJNA320339                 | <a href="#">SAMN04932627</a> | Fox et al., 2016  | 204        |
| 2023.EXT.0907.1014.080 | /                     | /    | NA | <a href="#">PRJEB10780</a>  | SAMEA3540881                 | Institut Pasteur  | 204        |
| 2023.EXT.0907.1229.110 | dairy cheese          | 2012 | NA | PRJNA320339                 | <a href="#">SAMN04932625</a> | Fox et al., 2016  | 204        |
| 2023.EXT.0907.1227.470 | dairy cheese          | 2011 | NA | PRJNA320339                 | SAMN04932624                 | Fox et al., 2016  | 204        |
| 2023.EXT.0907.1048.320 | dairy cheese          | 2010 | NA | PRJNA320339                 | <a href="#">SAMN04932623</a> | Fox et al., 2016  | 204        |
| 2023.EXT.0907.1016.190 | meat ham              | 2000 | NA | PRJNA320339                 | <a href="#">SAMN04932619</a> | Fox et al., 2016  | 204        |
| 2023.EXT.0907.1017.580 | meat environment      | 2007 | NA | PRJNA320339                 | SAMN04932620                 | Fox et al., 2016  | 204        |
| 2023.EXT.0907.1019.310 | dairy cheese          | 2009 | NA | PRJNA320339                 | <a href="#">SAMN04932621</a> | Fox et al., 2016  | 204        |
| 2023.EXT.0907.1020.540 | dairy cheese          | 2009 | NA | PRJNA320339                 | <a href="#">SAMN04932622</a> | Fox et al., 2016  | 204        |
| 2023.EXT.0907.1703.270 | environmental/food    | 2016 | NA | <a href="#">PRJNA215355</a> | <a href="#">SAMN22866749</a> | Chen et al., 2022 | 219        |
| 2023.EXT.0907.1706.590 | environmental/food    | 2016 | NA | <a href="#">PRJNA215355</a> | SAMN22867004                 | Chen et al., 2022 | 219        |
| 2023.EXT.0907.1710.340 | environmental/food    | 2017 | NA | <a href="#">PRJNA215355</a> | SAMN22883519                 | Chen et al., 2022 | 219        |
| 2023.EXT.0907.1720.030 | stool Snapping turtle | 2019 | NA | <a href="#">PRJNA514286</a> | <a href="#">SAMN13148884</a> | Chen et al., 2022 | 388        |
| 2023.EXT.0907.1716.370 | stool Mouse           | 2019 | NA | <a href="#">PRJNA514286</a> | <a href="#">SAMN13148881</a> | Chen et al., 2022 | 388        |
