# Supplementary material for: Genomic Characterization of Listeria monocytogenes and Other Listeria Species Isolated from Sea Turtles
Source: MDPI journal article supplement (doi:10.3390/microorganisms12040817), 2024-04-18
Supplement: s1 [file s1]

Table S3. GWAS CC7.

| Gene           | Non-unique<br>Gene name | Annotation                    | Number_pos<br>_present_in | Number_neg<br>_present_in | Number_pos_n<br>ot_present_in | Number_neg_n<br>ot_present_in | Sensi<br>tivity | Specificity            | Odds<br>_ratio | Naive_p                  |
|----------------|-------------------------|-------------------------------|---------------------------|---------------------------|-------------------------------|-------------------------------|-----------------|------------------------|----------------|--------------------------|
| hin_1          | hin_1                   | DNA-invertase hin             | 0                         | 182                       | 1                             | 4                             | 0.0             | 2.15053763<br>44086025 | 0.0            | 0.026737967<br>914438505 |
| group<br>_2727 |                         | hypothetical protein          | 0                         | 182                       | 1                             | 4                             | 0.0             | 2.15053763<br>44086025 | 0.0            | 0.026737967<br>914438505 |
| mco            | mco                     | Multicopper oxidase<br>mco    | 0                         | 182                       | 1                             | 4                             | 0.0             | 2.15053763<br>44086025 | 0.0            | 0.026737967<br>914438505 |
| group<br>_2712 |                         | hypothetical protein          | 0                         | 182                       | 1                             | 4                             | 0.0             | 2.15053763<br>44086025 | 0.0            | 0.026737967<br>914438505 |
| group<br>_2708 |                         | hypothetical protein          | 0                         | 182                       | 1                             | 4                             | 0.0             | 2.15053763<br>44086025 | 0.0            | 0.026737967<br>914438505 |
| group<br>_2707 |                         | hypothetical protein          | 0                         | 182                       | 1                             | 4                             | 0.0             | 2.15053763<br>44086025 | 0.0            | 0.026737967<br>914438505 |
| group<br>_2703 |                         | hypothetical protein          | 0                         | 182                       | 1                             | 4                             | 0.0             | 2.15053763<br>44086025 | 0.0            | 0.026737967<br>914438505 |
| group<br>_2702 |                         | hypothetical protein          | 0                         | 182                       | 1                             | 4                             | 0.0             | 2.15053763<br>44086025 | 0.0            | 0.026737967<br>914438505 |
| group<br>_2701 |                         | hypothetical protein          | 0                         | 182                       | 1                             | 4                             | 0.0             | 2.15053763<br>44086025 | 0.0            | 0.026737967<br>914438505 |
| group<br>_2700 |                         | hypothetical protein          | 0                         | 182                       | 1                             | 4                             | 0.0             | 2.15053763<br>44086025 | 0.0            | 0.026737967<br>914438505 |
| cadA           | cadA                    | cadmium resistance<br>protein | 0                         | 182                       | 1                             | 4                             | 0.0             | 2.15053763<br>44086025 | 0.0            | 0.026737967<br>914438505 |
| group<br>_2692 |                         | hypothetical protein          | 0                         | 182                       | 1                             | 4                             | 0.0             | 2.15053763<br>44086025 | 0.0            | 0.026737967<br>914438505 |
| hin_2          | hin_2                   | DNA-invertase hin             | 0                         | 182                       | 1                             | 4                             | 0.0             | 2.15053763<br>44086025 | 0.0            | 0.026737967<br>914438505 |
| group<br>_2691 |                         | hypothetical protein          | 0                         | 182                       | 1                             | 4                             | 0.0             | 2.15053763<br>44086025 | 0.0            | 0.026737967<br>914438505 |
| group<br>_2690 |                         | hypothetical protein          | 0                         | 182                       | 1                             | 4                             | 0.0             | 2.15053763<br>44086025 | 0.0            | 0.026737967<br>914438505 |
| group<br>_2686 |                         | hypothetical protein          | 0                         | 182                       | 1                             | 4                             | 0.0             | 2.15053763<br>44086025 | 0.0            | 0.026737967<br>914438505 |

|                              |      |                                       |   |     |   |   |     |                        |     |                          |
|------------------------------|------|---------------------------------------|---|-----|---|---|-----|------------------------|-----|--------------------------|
| <b>group</b><br><b>_987</b>  |      | hypothetical protein                  | 0 | 182 | 1 | 4 | 0.0 | 2.15053763<br>44086025 | 0.0 | 0.026737967<br>914438505 |
| <b>group</b><br><b>_2736</b> |      | hypothetical protein                  | 0 | 181 | 1 | 5 | 0.0 | 2.68817204<br>30107525 | 0.0 | 0.032085561<br>4973262   |
| <b>group</b><br><b>_2731</b> |      | hypothetical protein                  | 0 | 181 | 1 | 5 | 0.0 | 2.68817204<br>30107525 | 0.0 | 0.032085561<br>4973262   |
| <b>group</b><br><b>_2730</b> |      | hypothetical protein                  | 0 | 181 | 1 | 5 | 0.0 | 2.68817204<br>30107525 | 0.0 | 0.032085561<br>4973262   |
| <b>TSFM</b>                  | TSFM | Elongation factor Ts<br>mitochondrial | 0 | 181 | 1 | 5 | 0.0 | 2.68817204<br>30107525 | 0.0 | 0.032085561<br>4973262   |
| <b>group</b><br><b>_2726</b> |      | hypothetical protein                  | 0 | 181 | 1 | 5 | 0.0 | 2.68817204<br>30107525 | 0.0 | 0.032085561<br>4973262   |
| <b>group</b><br><b>_2725</b> |      | hypothetical protein                  | 0 | 181 | 1 | 5 | 0.0 | 2.68817204<br>30107525 | 0.0 | 0.032085561<br>4973262   |
| <b>group</b><br><b>_2724</b> |      | hypothetical protein                  | 0 | 181 | 1 | 5 | 0.0 | 2.68817204<br>30107525 | 0.0 | 0.032085561<br>4973262   |
| <b>group</b><br><b>_2723</b> |      | hypothetical protein                  | 0 | 181 | 1 | 5 | 0.0 | 2.68817204<br>30107525 | 0.0 | 0.032085561<br>4973262   |
| <b>group</b><br><b>_2720</b> |      | hypothetical protein                  | 0 | 181 | 1 | 5 | 0.0 | 2.68817204<br>30107525 | 0.0 | 0.032085561<br>4973262   |
| <b>group</b><br><b>_2719</b> |      | hypothetical protein                  | 0 | 181 | 1 | 5 | 0.0 | 2.68817204<br>30107525 | 0.0 | 0.032085561<br>4973262   |
| <b>group</b><br><b>_2717</b> |      | hypothetical protein                  | 0 | 181 | 1 | 5 | 0.0 | 2.68817204<br>30107525 | 0.0 | 0.032085561<br>4973262   |
| <b>group</b><br><b>_2716</b> |      | hypothetical protein                  | 0 | 181 | 1 | 5 | 0.0 | 2.68817204<br>30107525 | 0.0 | 0.032085561<br>4973262   |
| <b>npr</b>                   | npr  | NADH peroxidase                       | 0 | 181 | 1 | 5 | 0.0 | 2.68817204<br>30107525 | 0.0 | 0.032085561<br>4973262   |
| <b>group</b><br><b>_2715</b> |      | hypothetical protein                  | 0 | 181 | 1 | 5 | 0.0 | 2.68817204<br>30107525 | 0.0 | 0.032085561<br>4973262   |
| <b>group</b><br><b>_2713</b> |      | IS6 family<br>transposase ISLmo4      | 0 | 181 | 1 | 5 | 0.0 | 2.68817204<br>30107525 | 0.0 | 0.032085561<br>4973262   |
| <b>group</b><br><b>_2711</b> |      | hypothetical protein                  | 0 | 181 | 1 | 5 | 0.0 | 2.68817204<br>30107525 | 0.0 | 0.032085561<br>4973262   |
| <b>group</b><br><b>_2710</b> |      | IS6 family<br>transposase IS1297      | 0 | 181 | 1 | 5 | 0.0 | 2.68817204<br>30107525 | 0.0 | 0.032085561<br>4973262   |

|                              |      |                                           |   |     |   |   |     |                        |     |                        |
|------------------------------|------|-------------------------------------------|---|-----|---|---|-----|------------------------|-----|------------------------|
| <b>group</b><br><b>_2709</b> |      | hypothetical protein                      | 0 | 181 | 1 | 5 | 0.0 | 2.68817204<br>30107525 | 0.0 | 0.032085561<br>4973262 |
| <b>group</b><br><b>_2706</b> |      | hypothetical protein                      | 0 | 181 | 1 | 5 | 0.0 | 2.68817204<br>30107525 | 0.0 | 0.032085561<br>4973262 |
| <b>group</b><br><b>_2705</b> |      | Tn3 family<br>transposase                 | 0 | 181 | 1 | 5 | 0.0 | 2.68817204<br>30107525 | 0.0 | 0.032085561<br>4973262 |
| <b>soj</b>                   | soj  | Chromosome-<br>partitioning ATPase<br>Soj | 0 | 181 | 1 | 5 | 0.0 | 2.68817204<br>30107525 | 0.0 | 0.032085561<br>4973262 |
| <b>group</b><br><b>_2699</b> |      | hypothetical protein                      | 0 | 181 | 1 | 5 | 0.0 | 2.68817204<br>30107525 | 0.0 | 0.032085561<br>4973262 |
| <b>tnpR</b>                  | tnpR | Transposon Tn3<br>resolvase               | 0 | 181 | 1 | 5 | 0.0 | 2.68817204<br>30107525 | 0.0 | 0.032085561<br>4973262 |
| <b>group</b><br><b>_2697</b> |      | hypothetical protein                      | 0 | 181 | 1 | 5 | 0.0 | 2.68817204<br>30107525 | 0.0 | 0.032085561<br>4973262 |
| <b>group</b><br><b>_2696</b> |      | hypothetical protein                      | 0 | 181 | 1 | 5 | 0.0 | 2.68817204<br>30107525 | 0.0 | 0.032085561<br>4973262 |
| <b>group</b><br><b>_2695</b> |      | hypothetical protein                      | 0 | 181 | 1 | 5 | 0.0 | 2.68817204<br>30107525 | 0.0 | 0.032085561<br>4973262 |
| <b>group</b><br><b>_2694</b> |      | hypothetical protein                      | 0 | 181 | 1 | 5 | 0.0 | 2.68817204<br>30107525 | 0.0 | 0.032085561<br>4973262 |
| <b>group</b><br><b>_2693</b> |      | hypothetical protein                      | 0 | 181 | 1 | 5 | 0.0 | 2.68817204<br>30107525 | 0.0 | 0.032085561<br>4973262 |
| <b>group</b><br><b>_2688</b> |      | hypothetical protein                      | 0 | 181 | 1 | 5 | 0.0 | 2.68817204<br>30107525 | 0.0 | 0.032085561<br>4973262 |
| <b>group</b><br><b>_2687</b> |      | IS6 family<br>transposase IS1216E         | 0 | 181 | 1 | 5 | 0.0 | 2.68817204<br>30107525 | 0.0 | 0.032085561<br>4973262 |
| <b>group</b><br><b>_2735</b> |      | hypothetical protein                      | 0 | 180 | 1 | 6 | 0.0 | 3.22580645<br>1612903  | 0.0 | 0.037433155<br>0802139 |
| <b>group</b><br><b>_2734</b> |      | hypothetical protein                      | 0 | 180 | 1 | 6 | 0.0 | 3.22580645<br>1612903  | 0.0 | 0.037433155<br>0802139 |
| <b>group</b><br><b>_2733</b> |      | hypothetical protein                      | 0 | 180 | 1 | 6 | 0.0 | 3.22580645<br>1612903  | 0.0 | 0.037433155<br>0802139 |
| <b>group</b><br><b>_2732</b> |      | IS21 family<br>transposase ISLmo7         | 0 | 180 | 1 | 6 | 0.0 | 3.22580645<br>1612903  | 0.0 | 0.037433155<br>0802139 |

|                   |        |                                  |   |     |   |   |     |                   |     |                    |
|-------------------|--------|----------------------------------|---|-----|---|---|-----|-------------------|-----|--------------------|
| <b>group_2729</b> |        | IS3 family transposase ISLmo9    | 0 | 180 | 1 | 6 | 0.0 | 3.225806451612903 | 0.0 | 0.0374331550802139 |
| <b>clpE_2</b>     | clpE_2 | ATP-dependent protease           | 0 | 180 | 1 | 6 | 0.0 | 3.225806451612903 | 0.0 | 0.0374331550802139 |
| <b>group_2722</b> |        | hypothetical protein             | 0 | 180 | 1 | 6 | 0.0 | 3.225806451612903 | 0.0 | 0.0374331550802139 |
| <b>group_2721</b> |        | hypothetical protein             | 0 | 180 | 1 | 6 | 0.0 | 3.225806451612903 | 0.0 | 0.0374331550802139 |
| <b>group_2714</b> |        | ISLre2 family transposase ISAot1 | 0 | 180 | 1 | 6 | 0.0 | 3.225806451612903 | 0.0 | 0.0374331550802139 |
| <b>group_2704</b> |        | hypothetical protein             | 0 | 180 | 1 | 6 | 0.0 | 3.225806451612903 | 0.0 | 0.0374331550802139 |
| <b>group_2698</b> |        | IS3 family transposase ISLmo8    | 0 | 180 | 1 | 6 | 0.0 | 3.225806451612903 | 0.0 | 0.0374331550802139 |
| <b>group_2689</b> |        | hypothetical protein             | 0 | 180 | 1 | 6 | 0.0 | 3.225806451612903 | 0.0 | 0.0374331550802139 |
| <b>group_2728</b> |        | hypothetical protein             | 0 | 179 | 1 | 7 | 0.0 | 3.763440860215054 | 0.0 | 0.0427807486631016 |
