# Supplementary material for: Genomic Characterization of Listeria monocytogenes and Other Listeria Species Isolated from Sea Turtles
Source: MDPI journal article supplement (doi:10.3390/microorganisms12040817), 2024-04-18
Supplement: s1 [file s1]

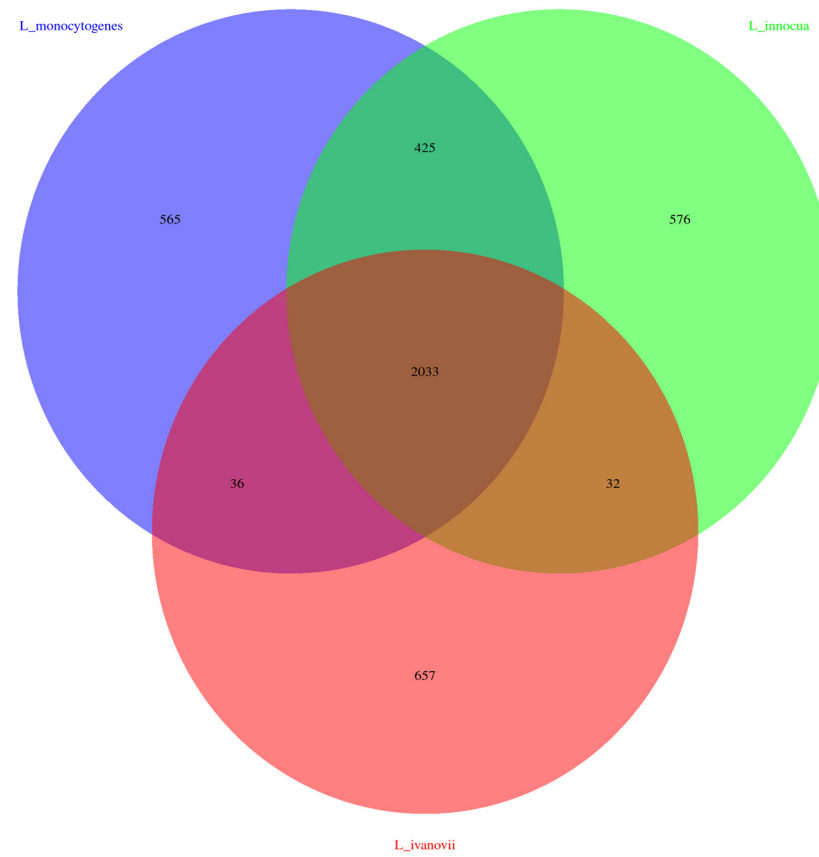

Figure S1. Pangenome analysis of the isolates in this study, grouped by species. Numbers represent gene coding loci associated with one or more species
