# Supplementary material for: Genomic Characterization of Listeria monocytogenes and Other Listeria Species Isolated from Sea Turtles
Source: Microorganisms. 2024 Apr 18;12(4):817. doi: 10.3390/microorganisms12040817 (PMC11052188; doi:10.3390/microorganisms12040817)
Supplement: Supplementary file 1 [file microorganisms-12-00817-s001.zip]

Archive with 4 entries (4 files):
- microrganism 2912735_Figure S1. Pangenome analysis of the isolates in this study, grouped by species..pdf
- microrganism 2912735_Table S1. Sequences used in the study..pdf
- microrganism 2912735_Table S2. Gene presence between sea turtle strains..pdf
- microrganism 2912735_Table S3. GWAS CCT..pdf
